# Supplementary material for: New Quinolone-Based Thiosemicarbazones Showing Activity Against Plasmodium falciparum and Mycobacterium tuberculosis
Source: MDPI journal article supplement (doi:10.3390/molecules24091740), 2019-05-04

# Supplementary Materials: New Quinolone-Based Thiosemicarbazones Showing Activity Against *Plasmodium falciparum* and *Mycobacterium tuberculosis*

Richard M. Beteck<sup>1\*</sup>, Ronnett Seldon<sup>2</sup>, Audrey Jordaan<sup>3</sup>, Digby F. Warner<sup>3,4,5</sup>, Heinrich C. Hoppe<sup>6,7</sup>, Michelle Isaacs<sup>7</sup>, Dustin Laming<sup>7</sup>, and Setshaba D. Khanye<sup>1,7\*</sup>

<sup>1</sup> Faculty of Pharmacy, Division of Pharmaceutical Chemistry, Rhodes University, Grahamstown 6140, South Africa

<sup>2</sup> Drug Discovery and Development Centre (H3-D), Department of Chemistry, University of Cape Town, Rondebosch 7701, South Africa

<sup>3</sup> SAMRC/NHLS/UCT Molecular Mycobacteriology Research Unit, Department of Pathology, University of Cape Town, Observatory 7925, South Africa

<sup>4</sup> Institute of Infectious Disease and Molecular Medicine, University of Cape Town, Observatory 7925, South Africa

<sup>5</sup> Wellcome Centre for Infectious Diseases Research in Africa, University of Cape Town, Observatory 7925, South Africa

<sup>6</sup> Faculty of Science, Department of Biochemistry and Microbiology, Rhodes University, Grahamstown 6140, South Africa

<sup>7</sup> Centre for Chemico- and Biomedical Research, Rhodes University, Grahamstown 6140, South Africa

\* Correspondence: [s.khanye@ru.ac.za](mailto:s.khanye@ru.ac.za) (S.D.K); Tel.: +27-46-603-8397 (S.D.K)

Received: date; Accepted: date; Published: date

# COMPOUND 11

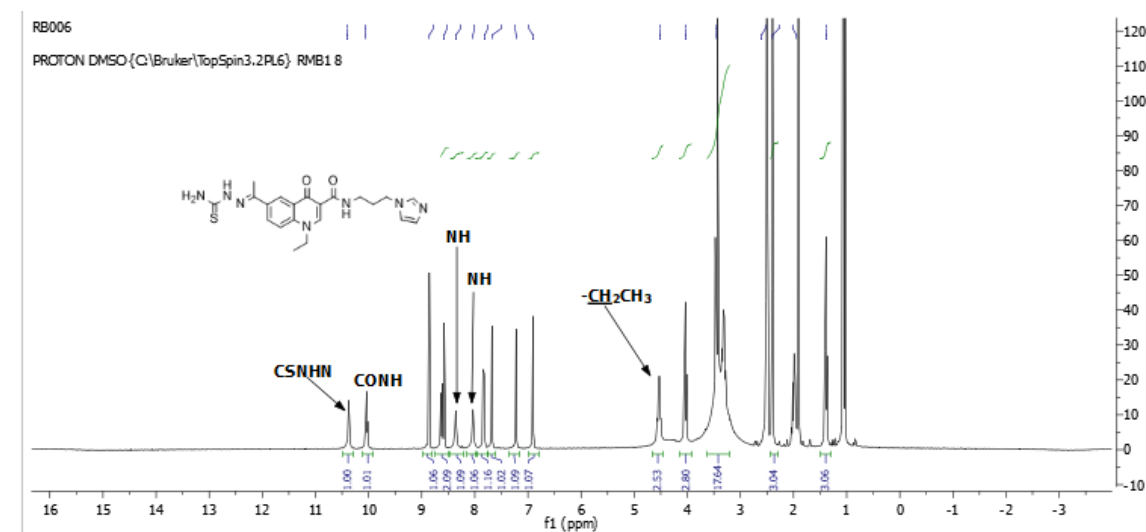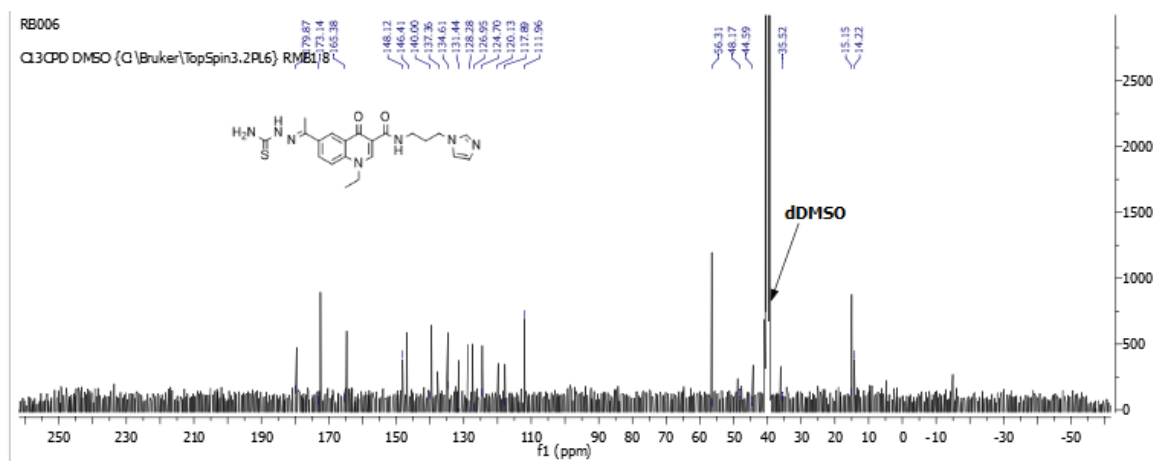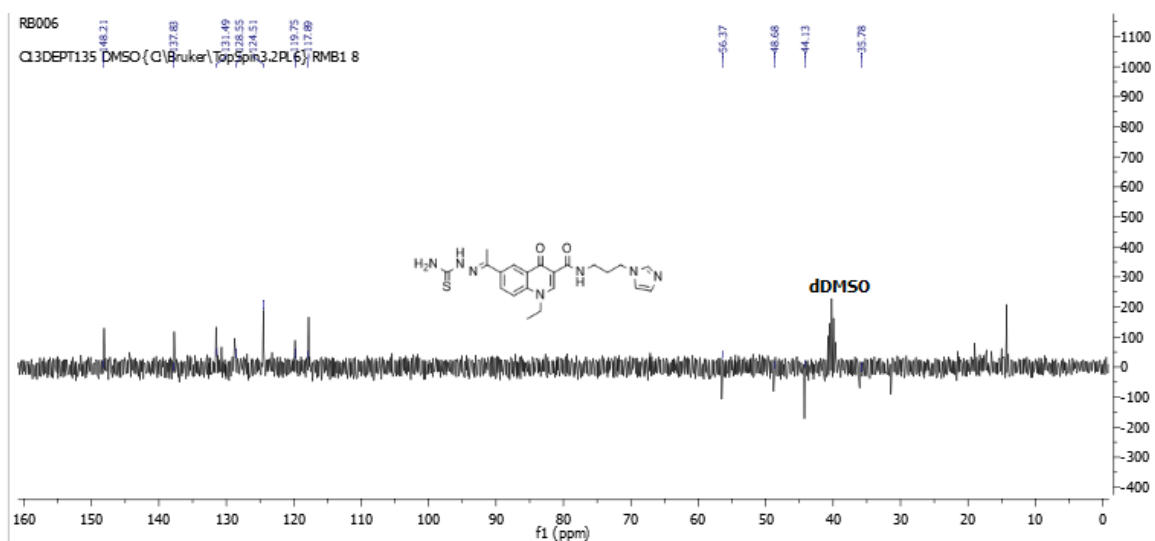

# COMPOUND 12

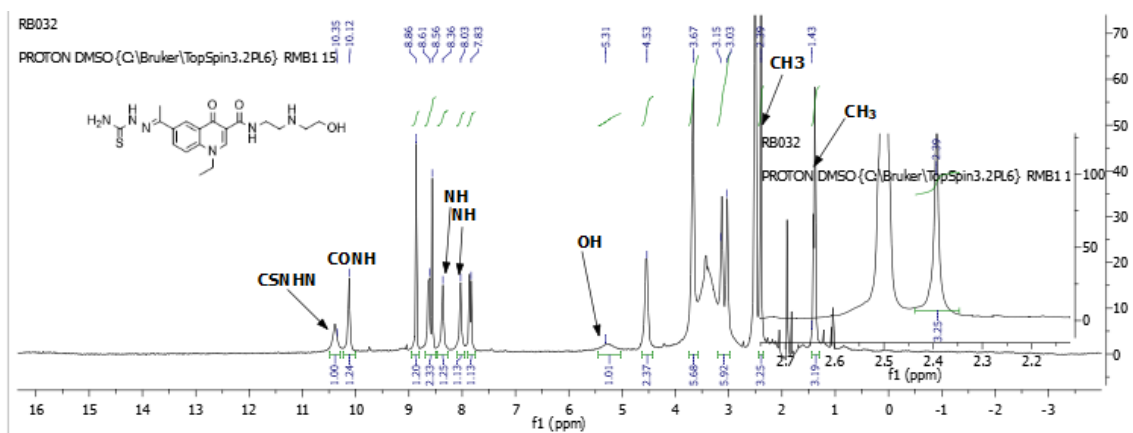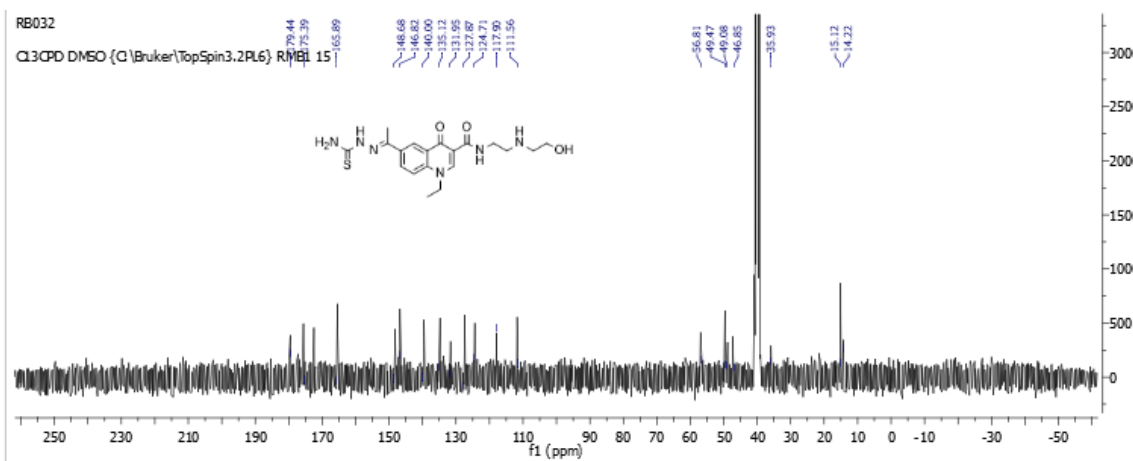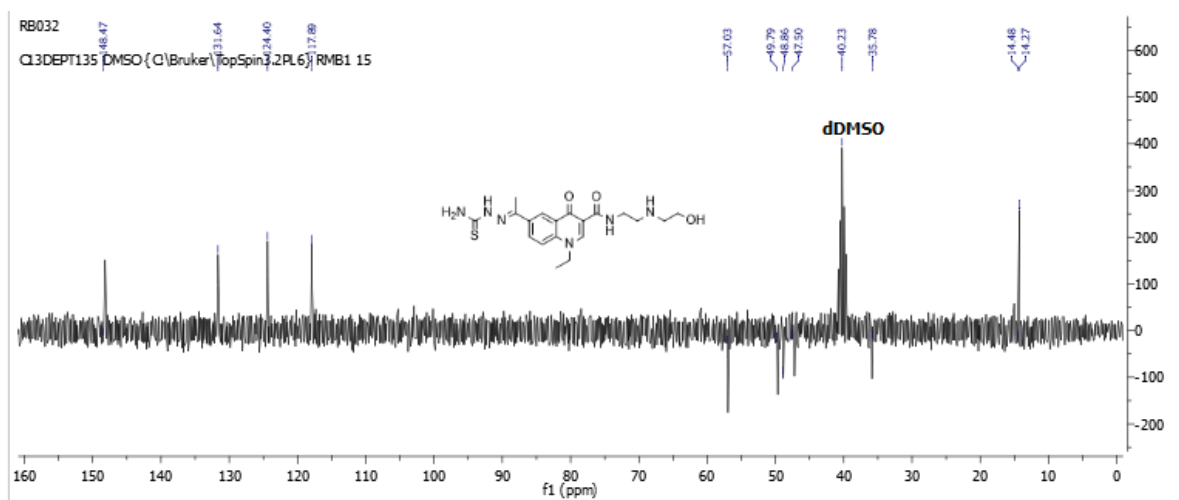

## COMPOUND 13

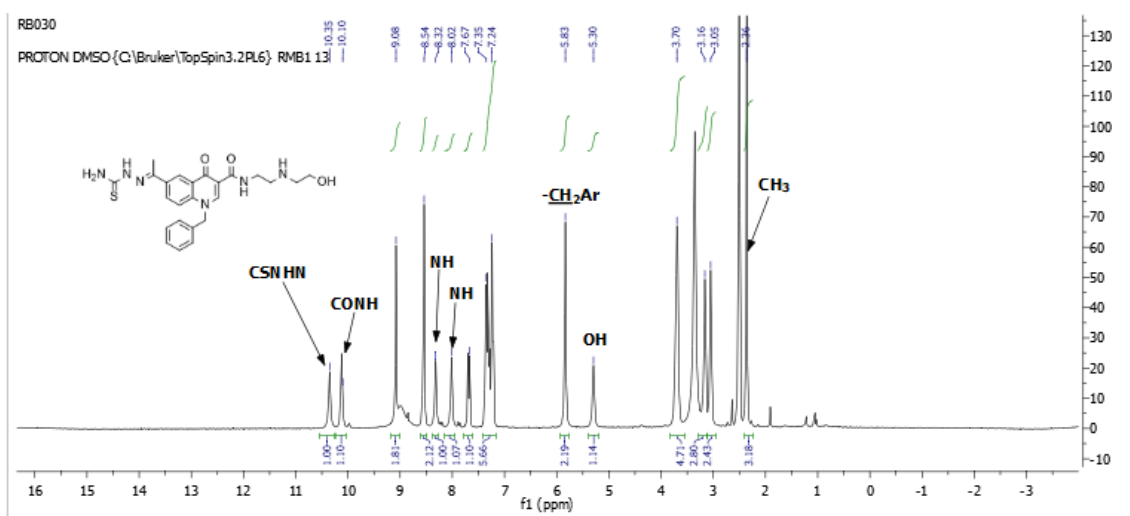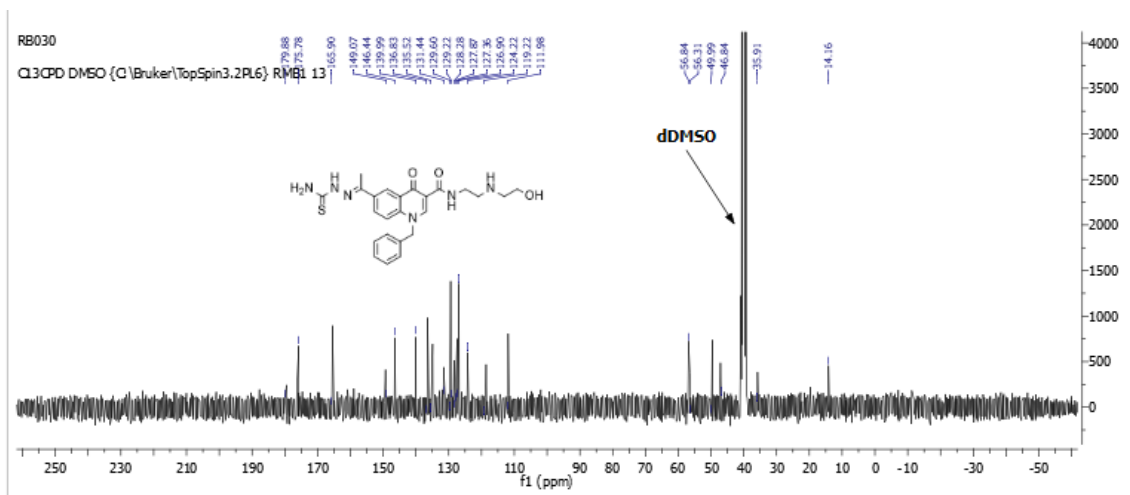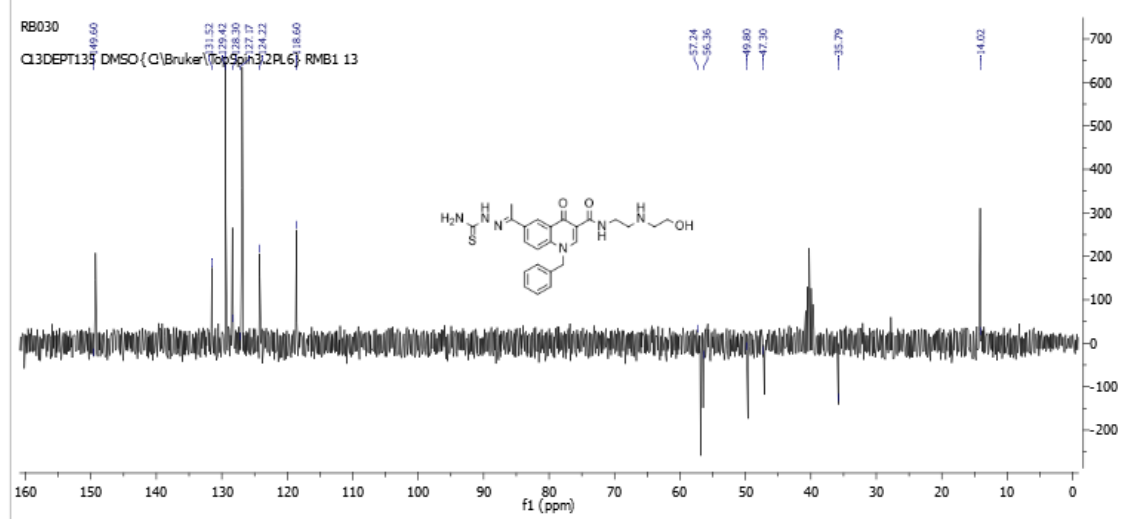

# COMPOUND 14

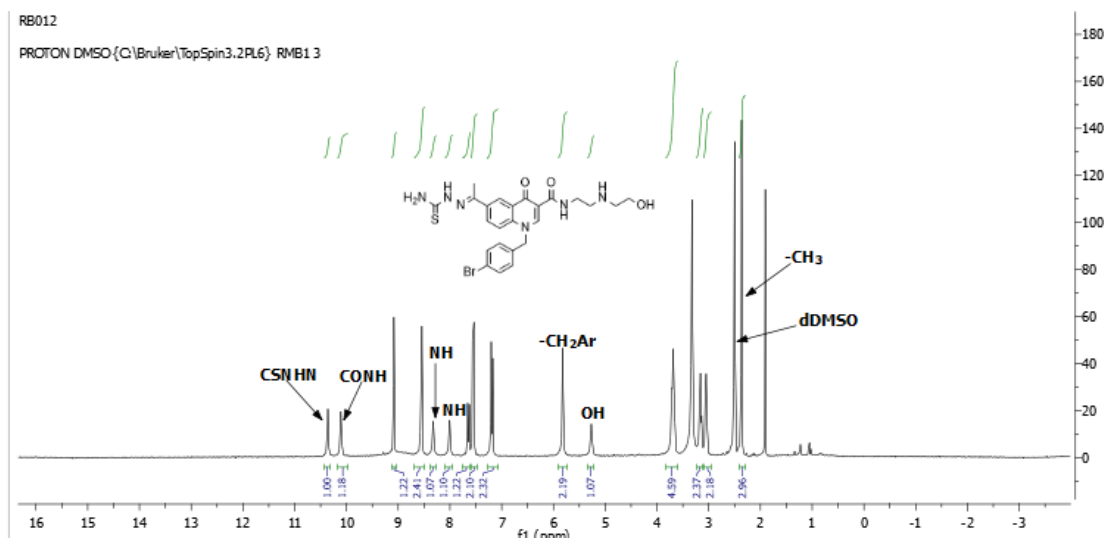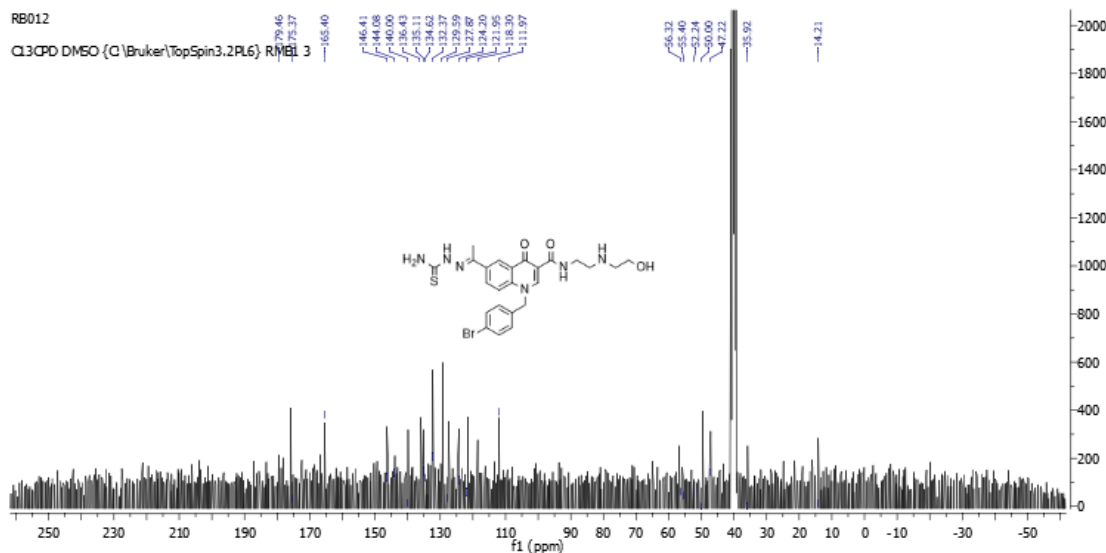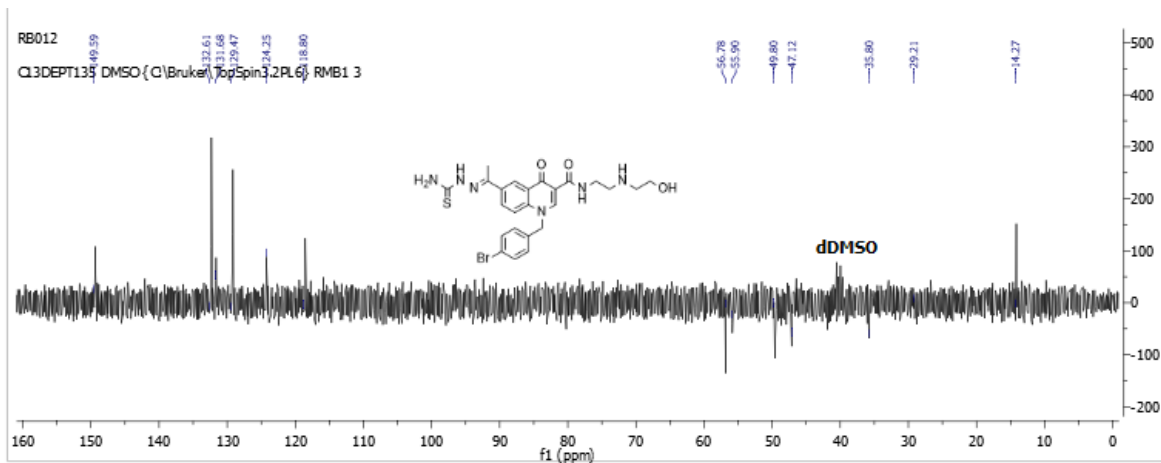

## COMPOUND 15

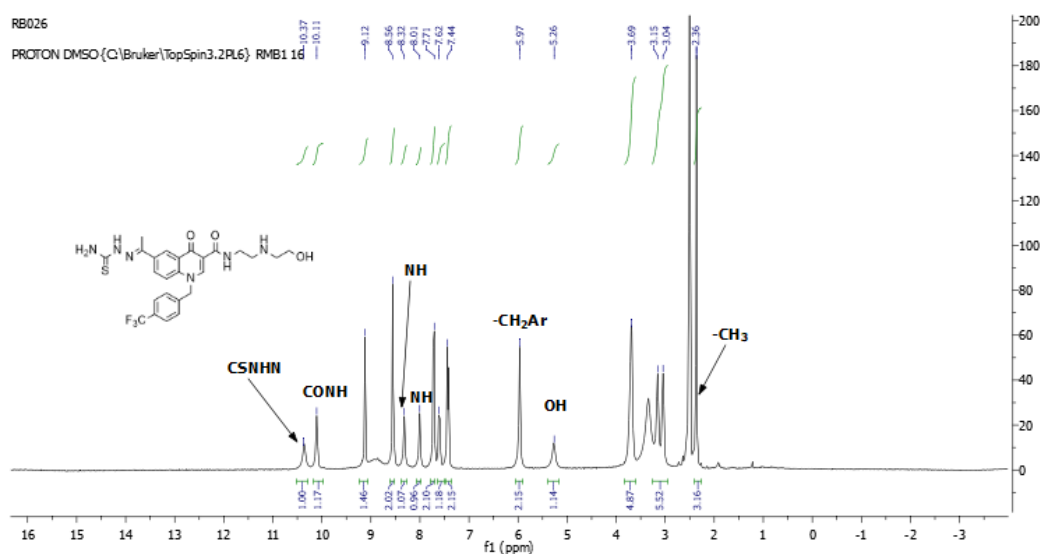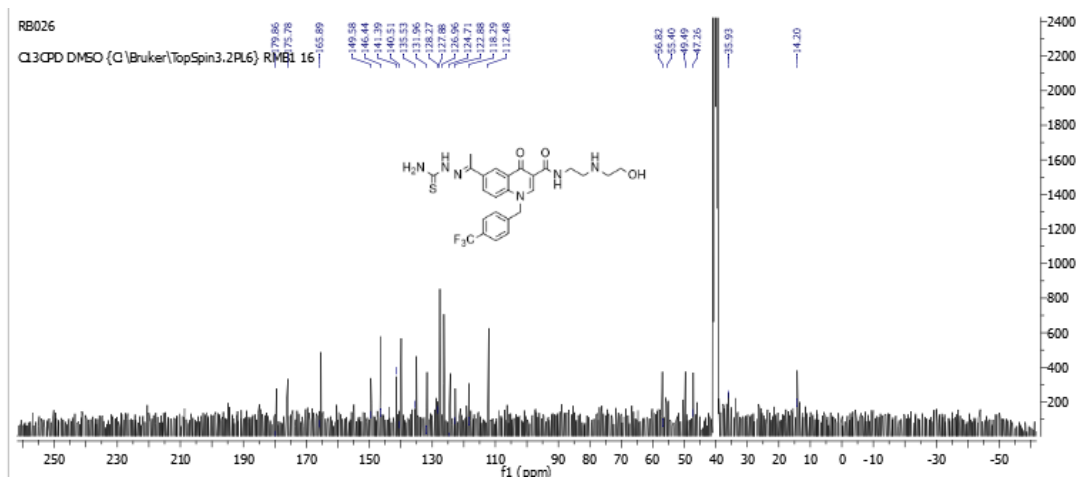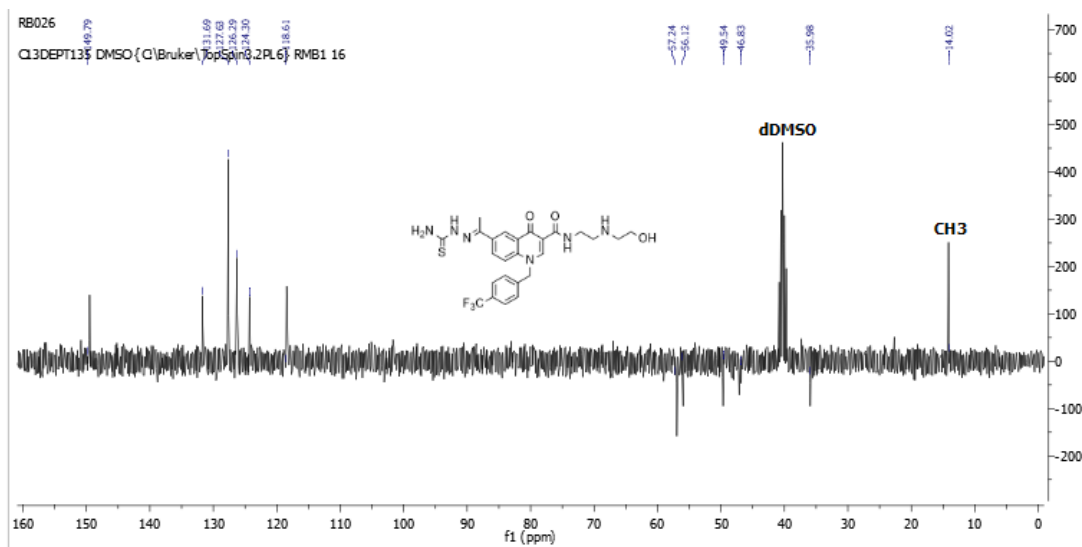

# COMPOUND 16

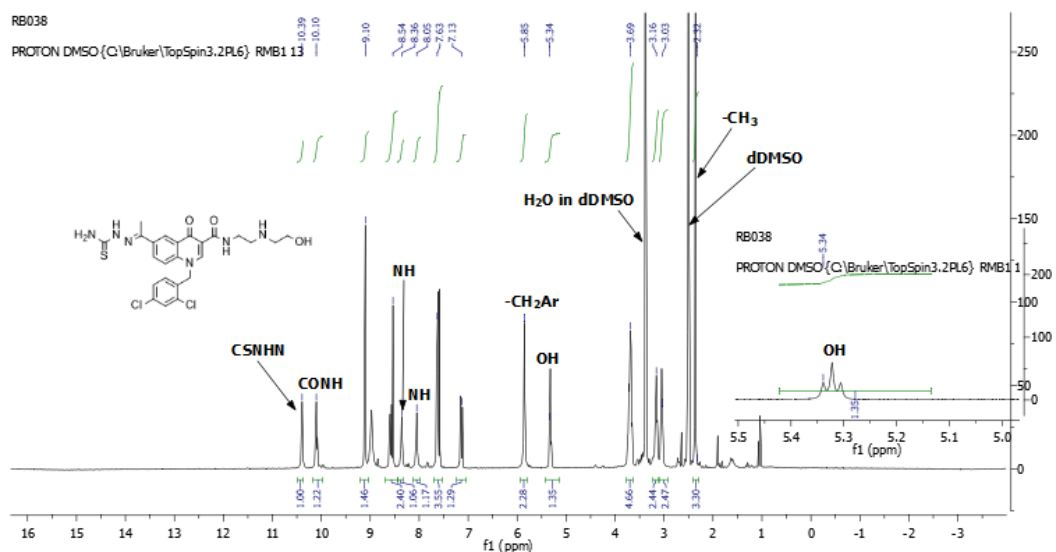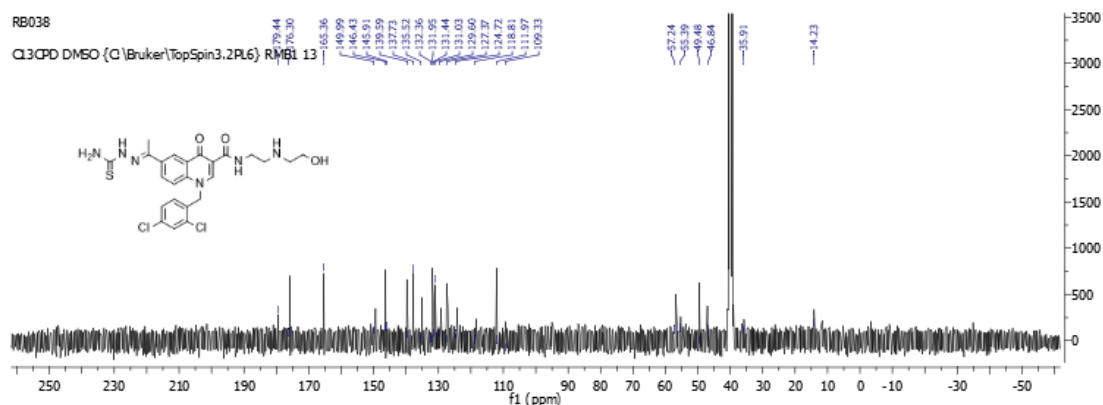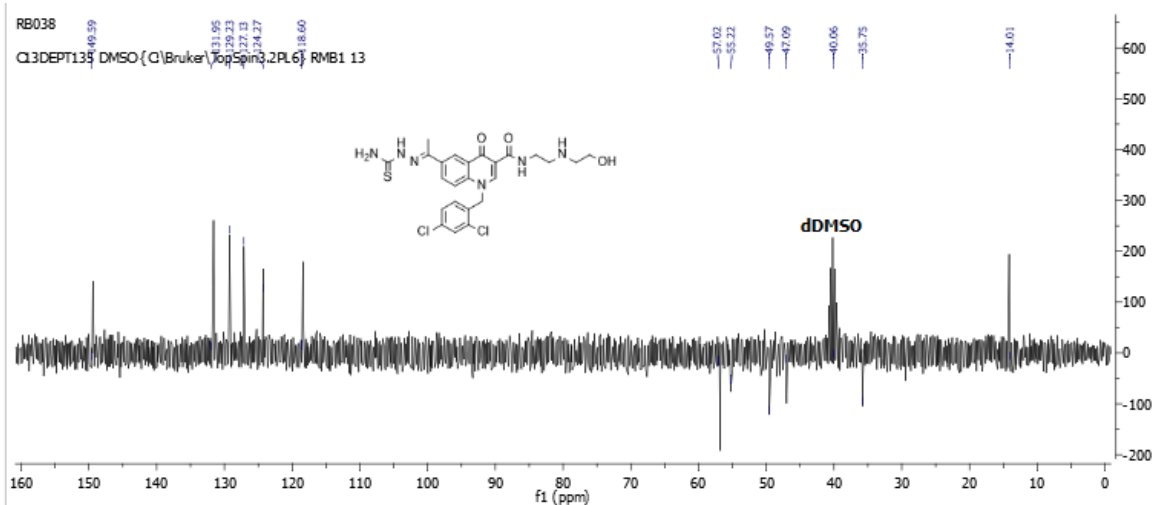

# COMPOUND 17

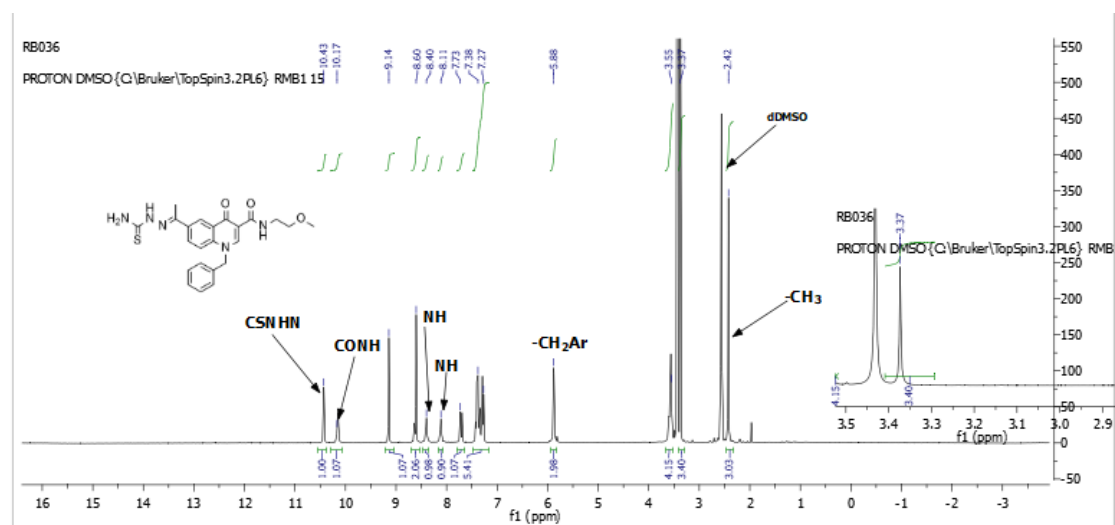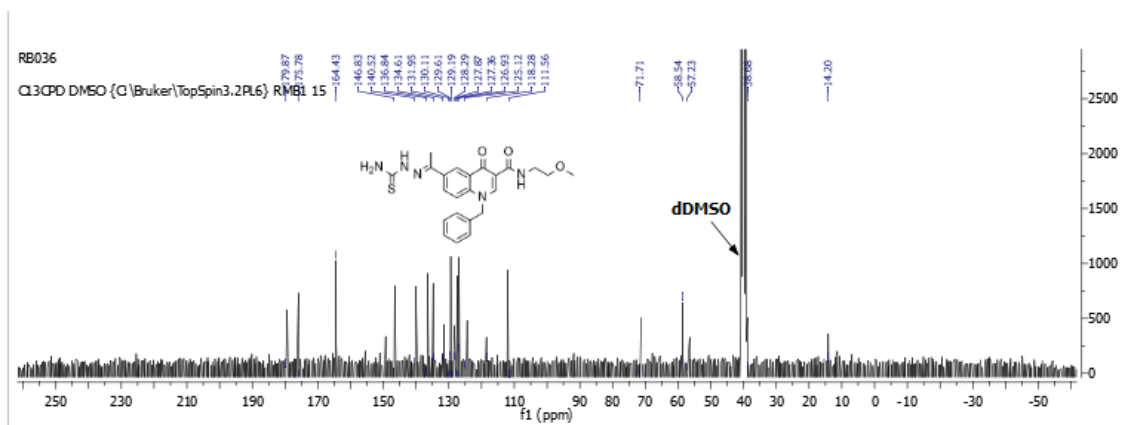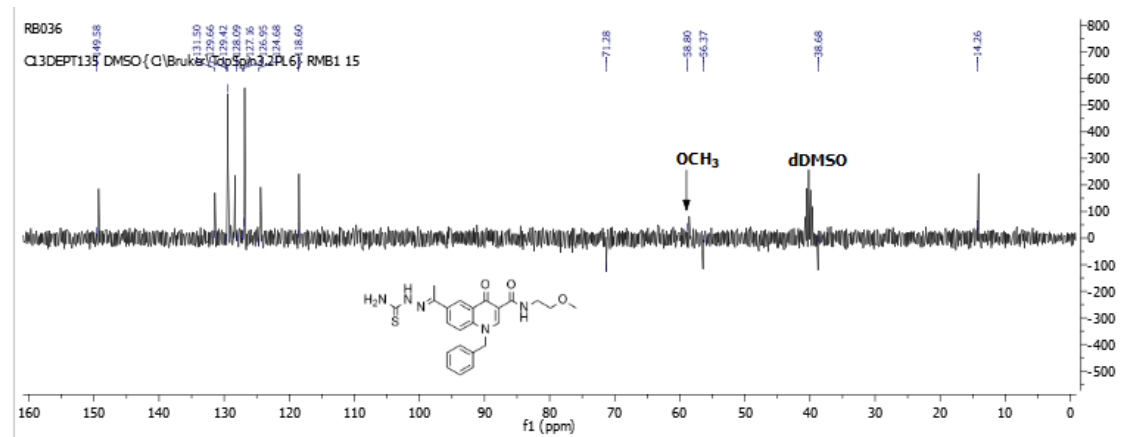



# COMPOUND 18

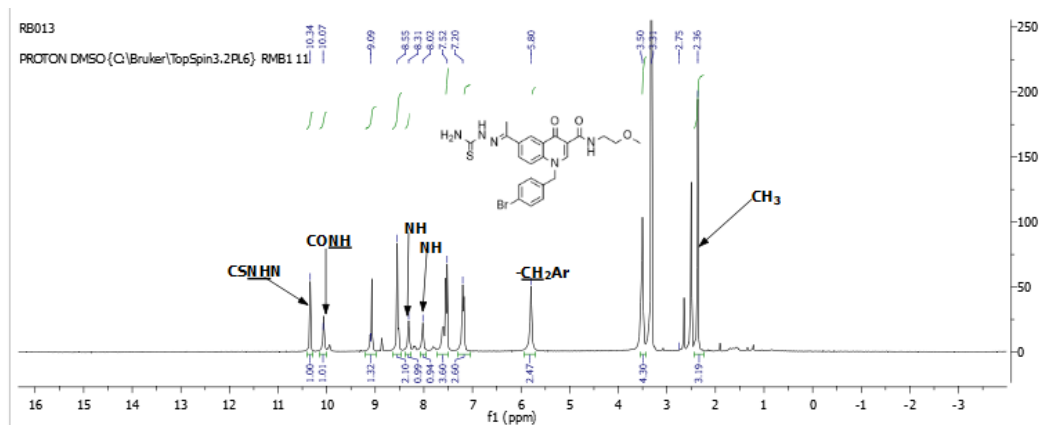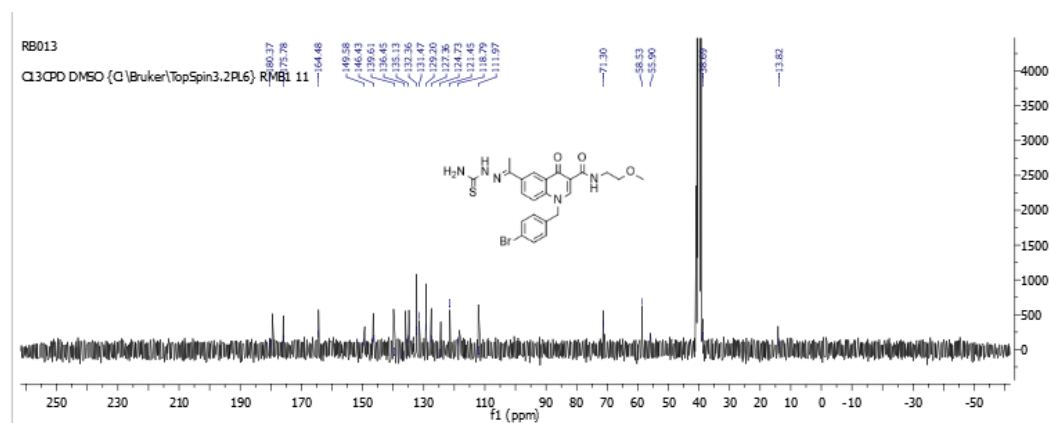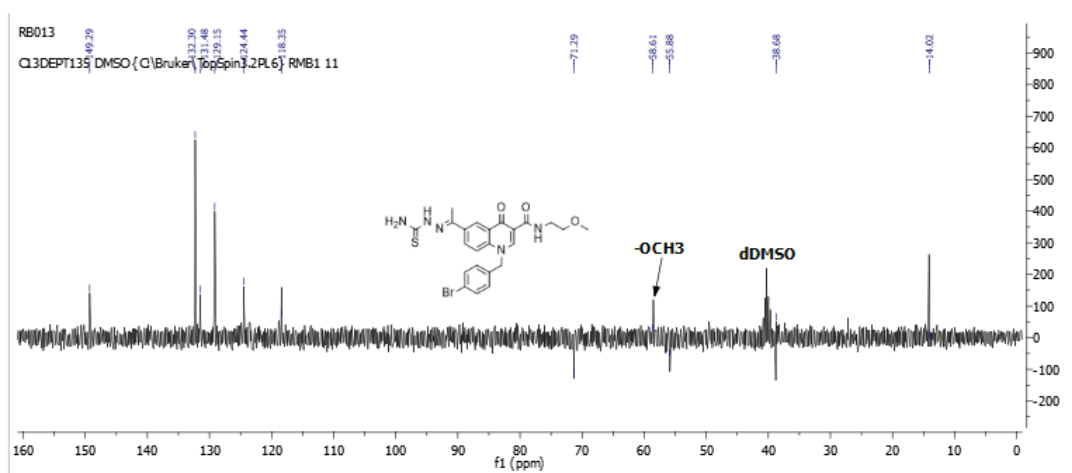

# COMPOUND 19

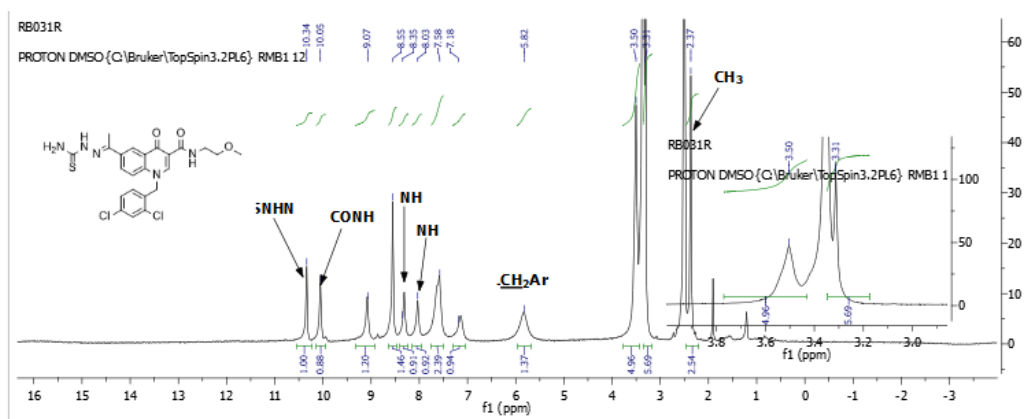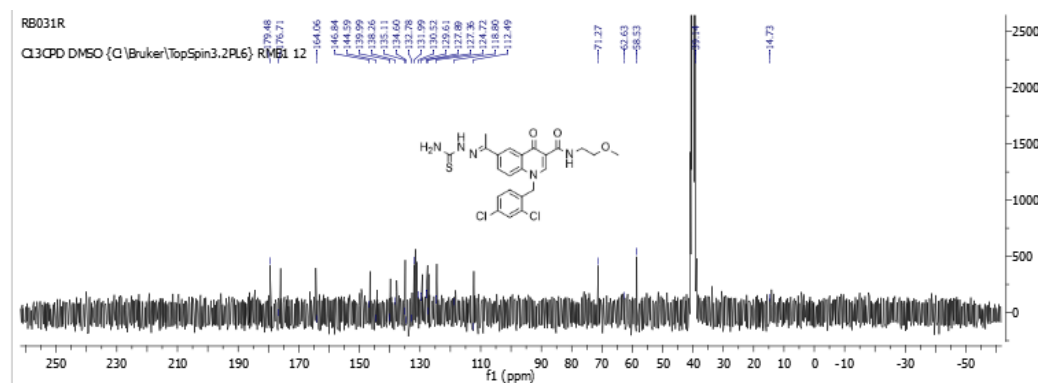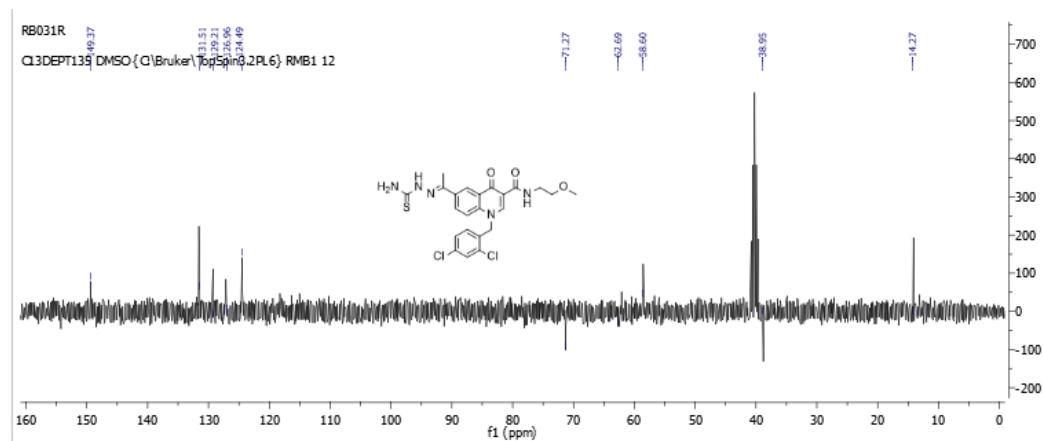

# COMPOUND 20

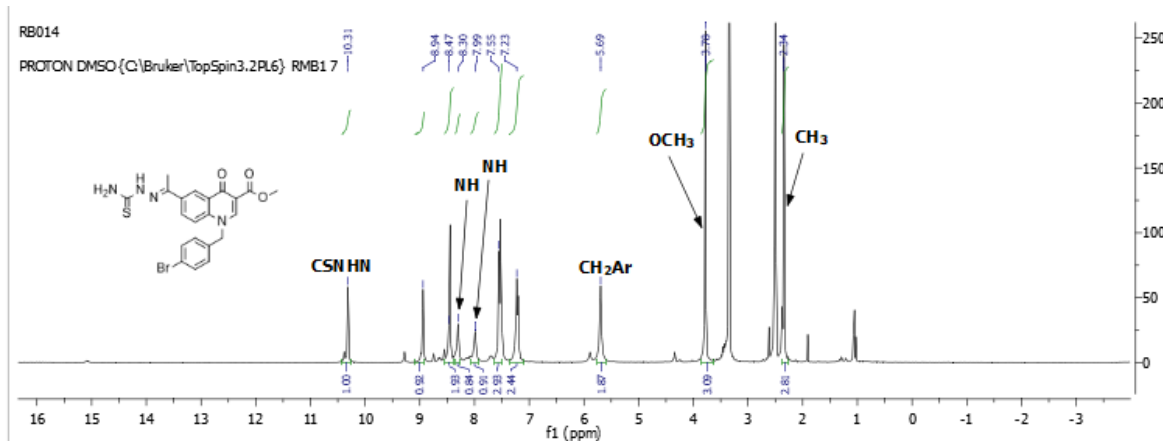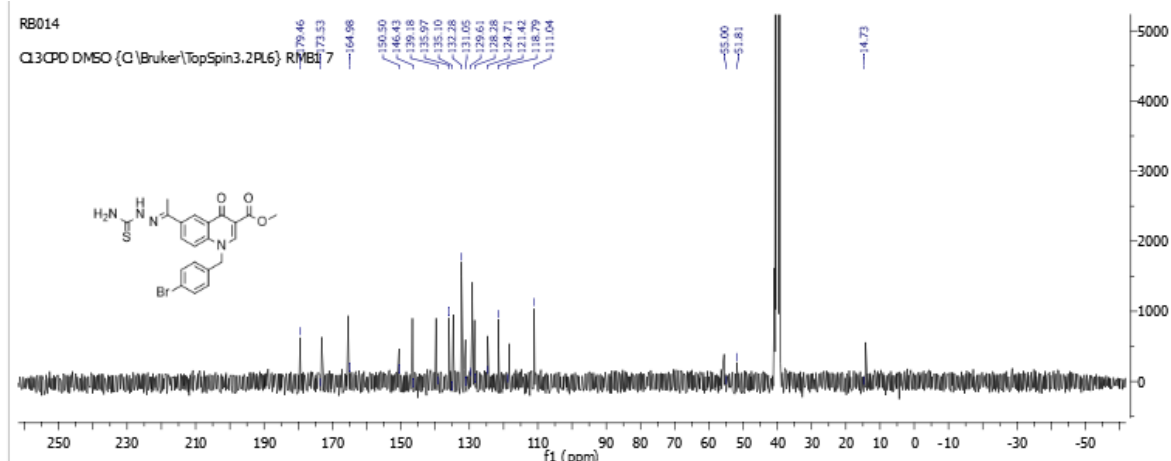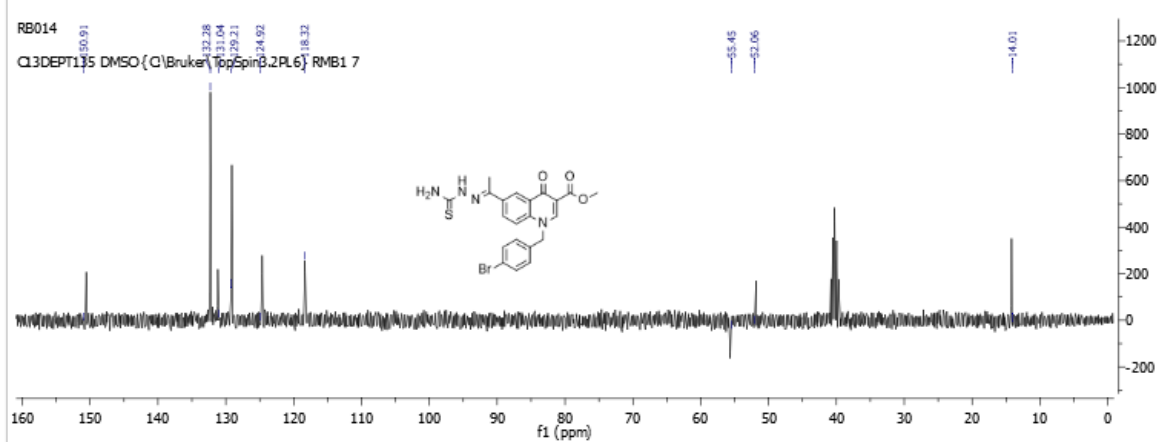

# COMPOUND 21

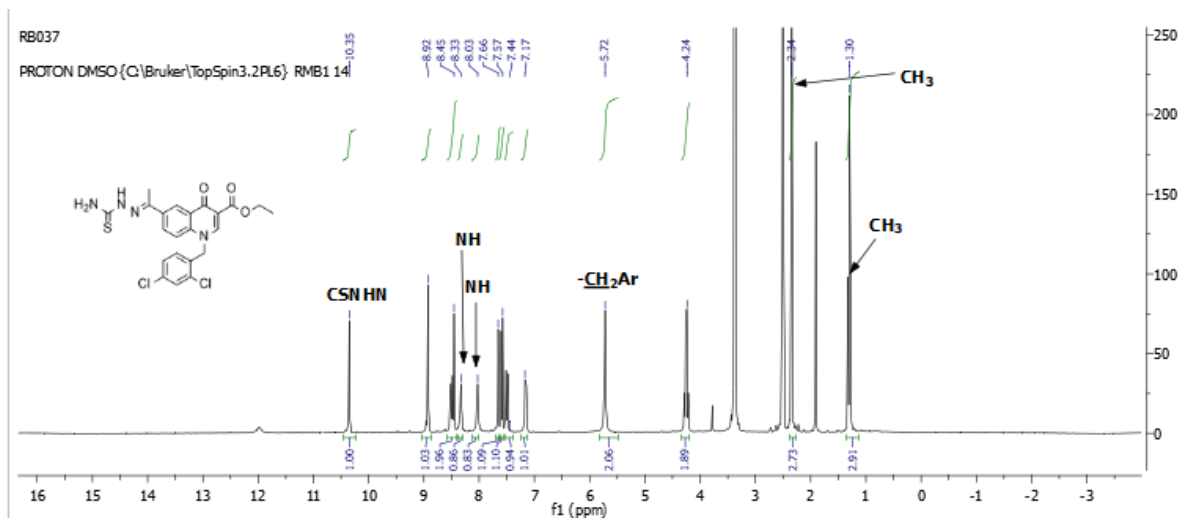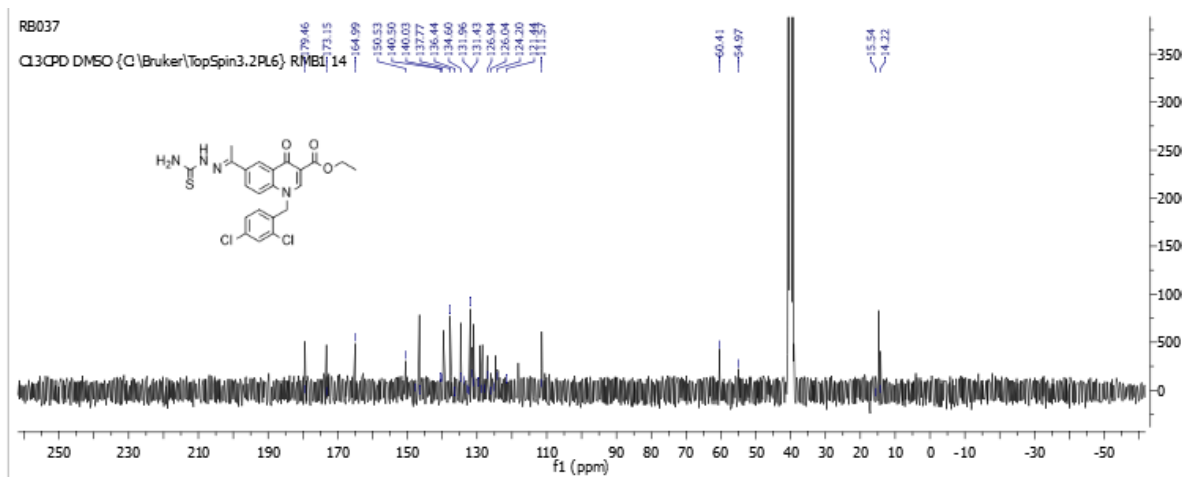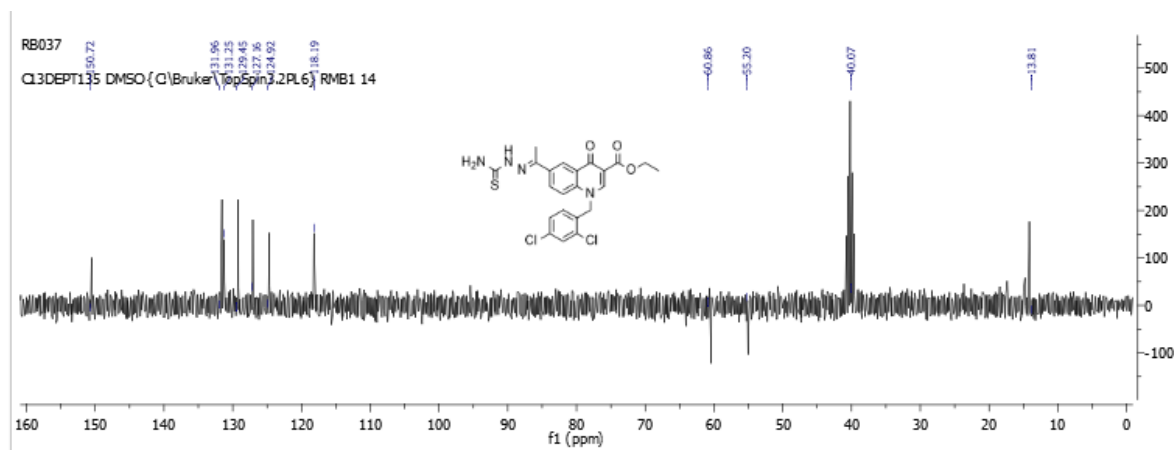

## COMPOUND 11

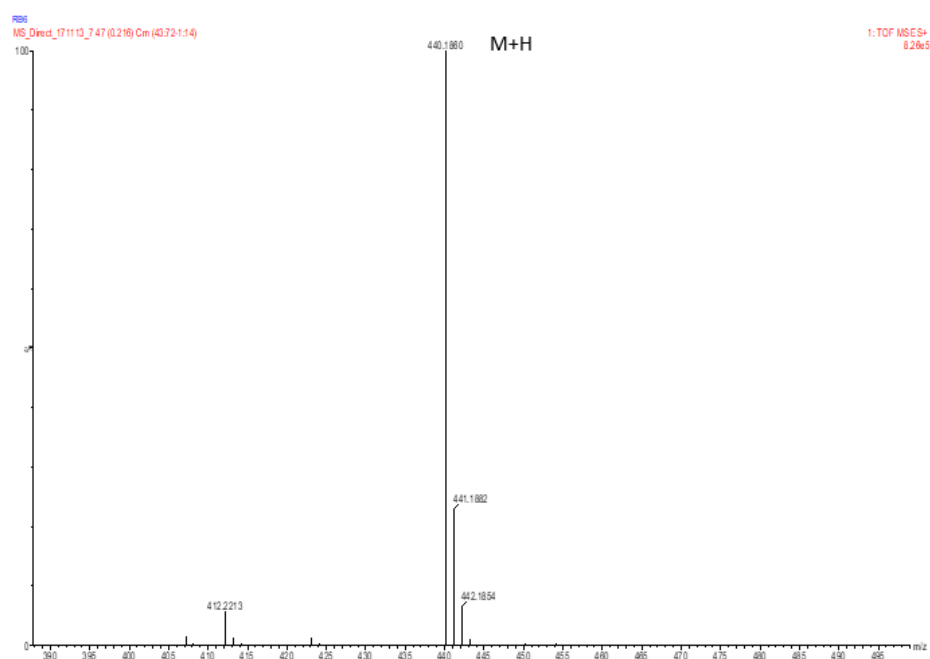

## COMPOUND 12

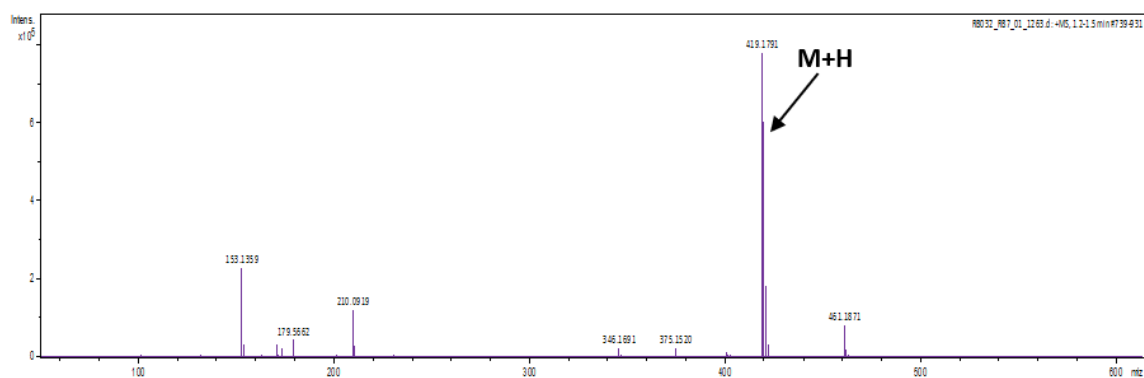

## COMPOUND 13

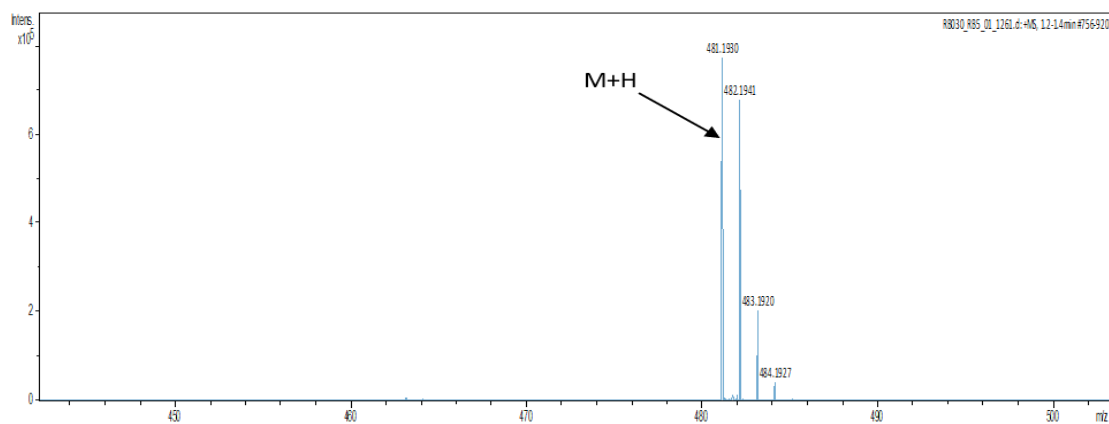

## COMPOUND 14

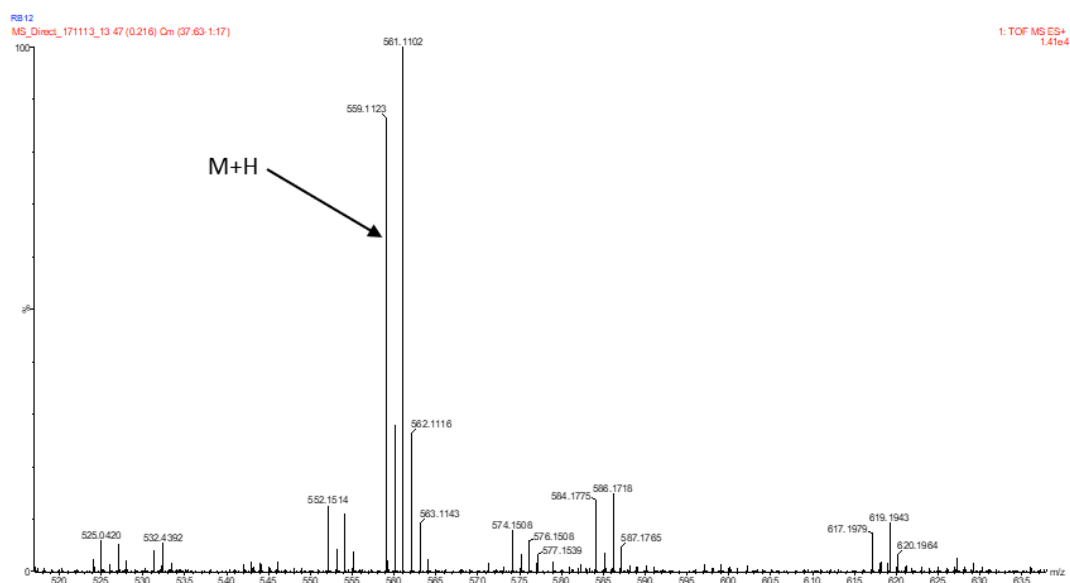

## COMPOUND 15

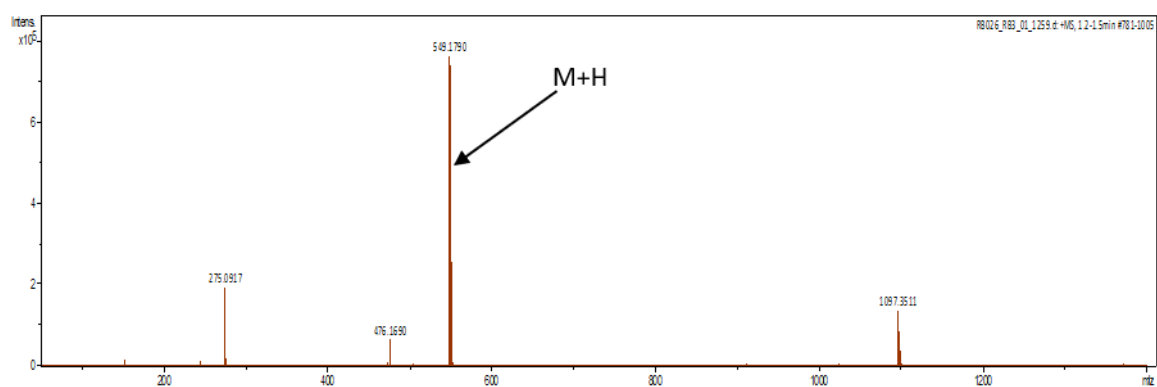

## COMPOUND 16

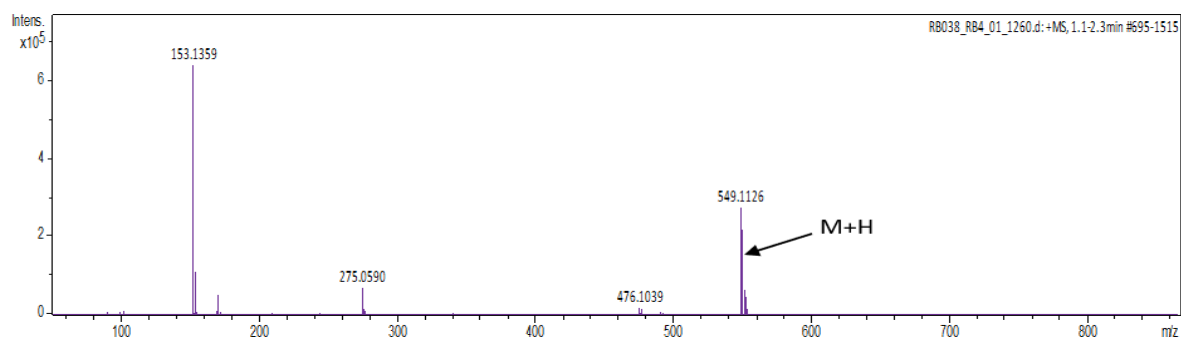

## COMPOUND 17

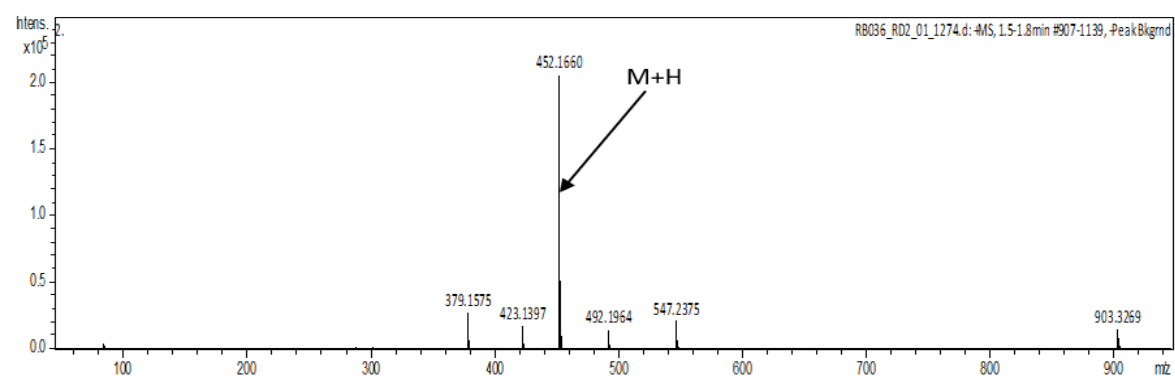

## COMPOUND 18

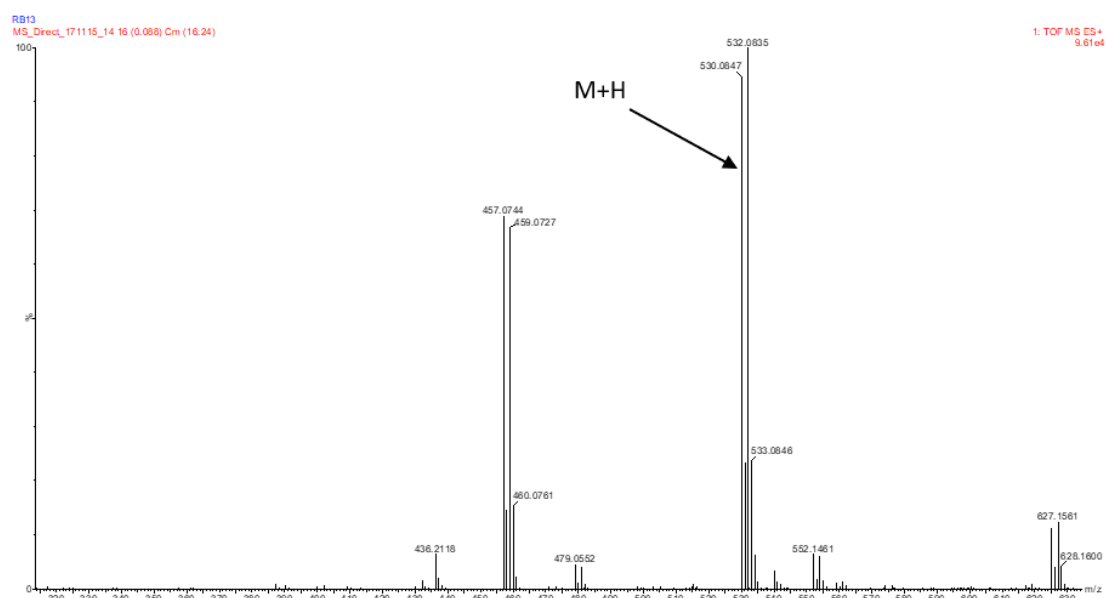

## COMPOUND 19

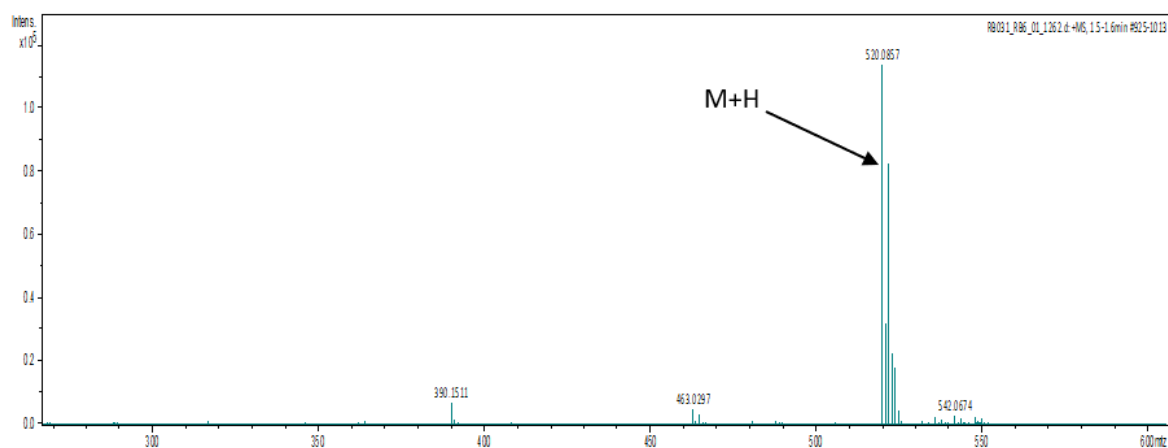

## COMPOUND 20

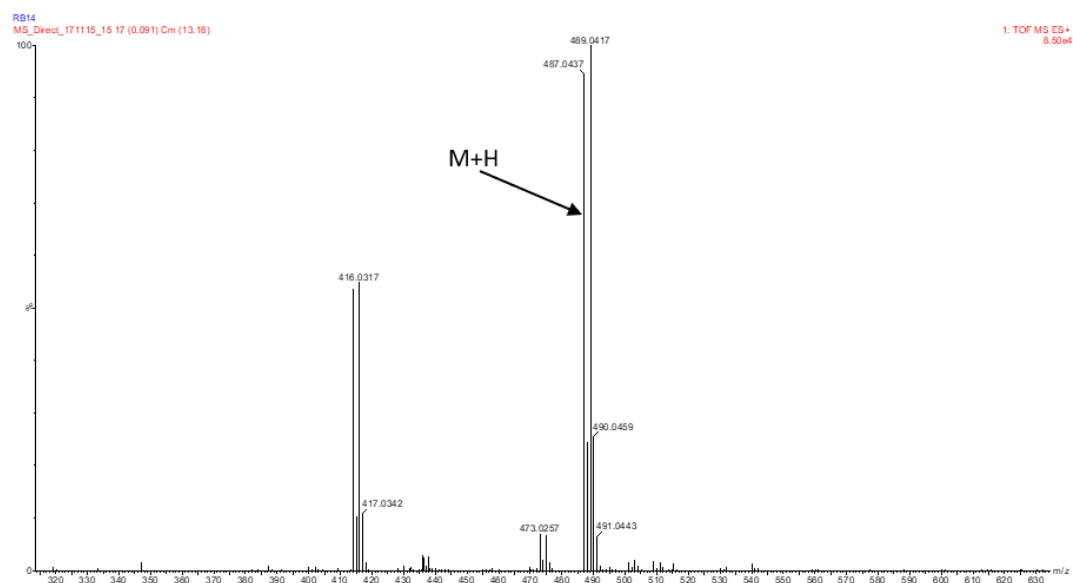

## COMPOUND 21

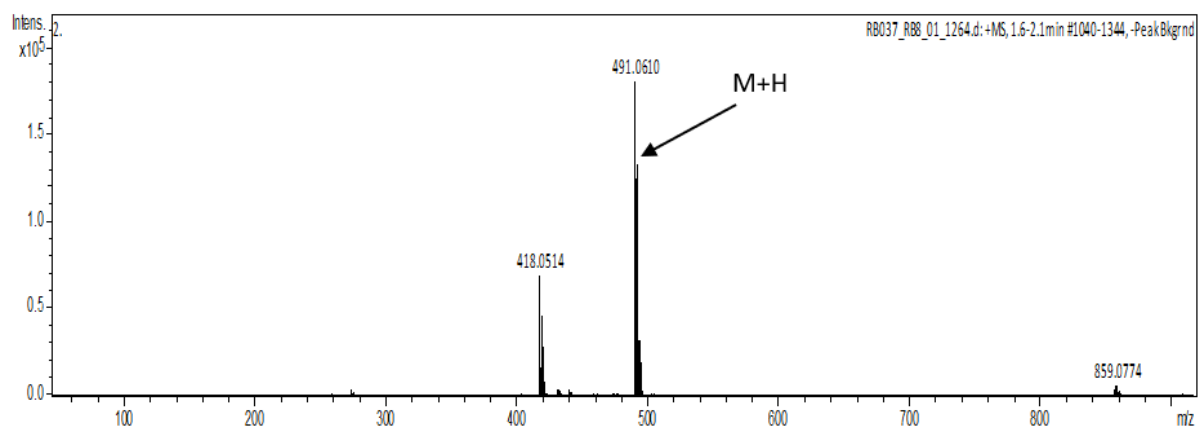



### COMPOUND 11

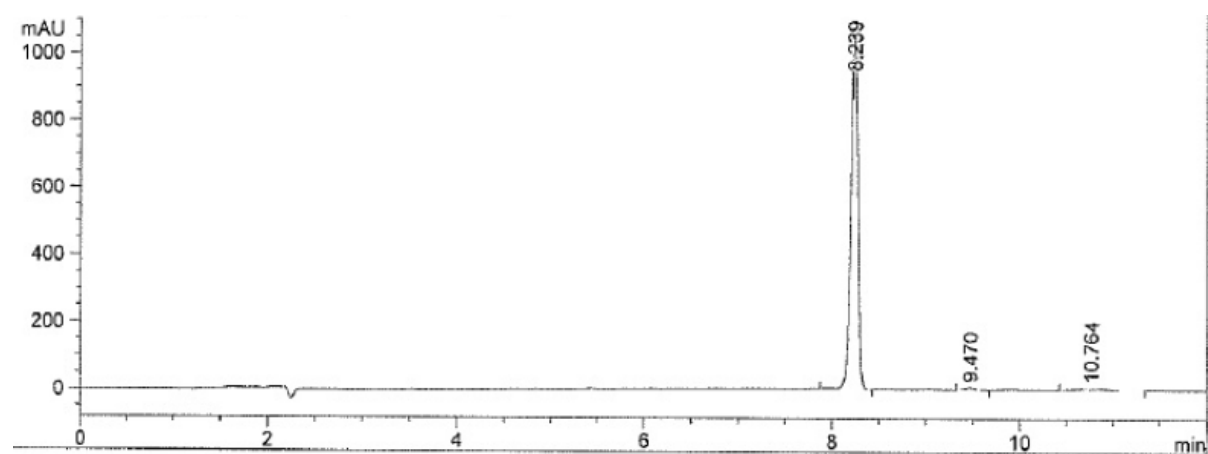

### COMPOUND 12

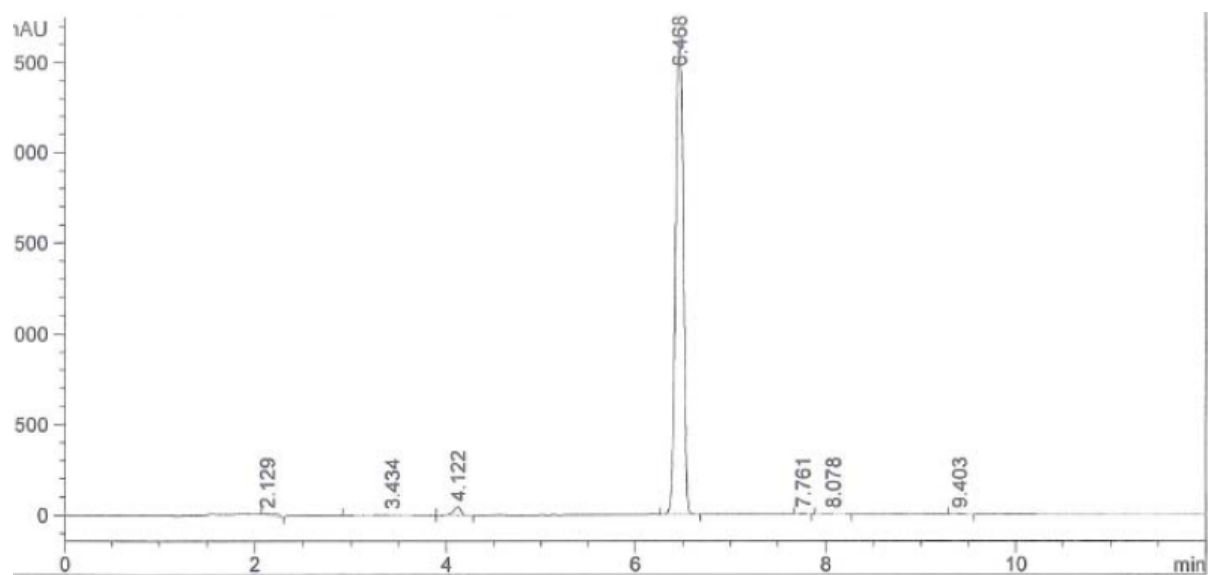

### COMPOUND 13

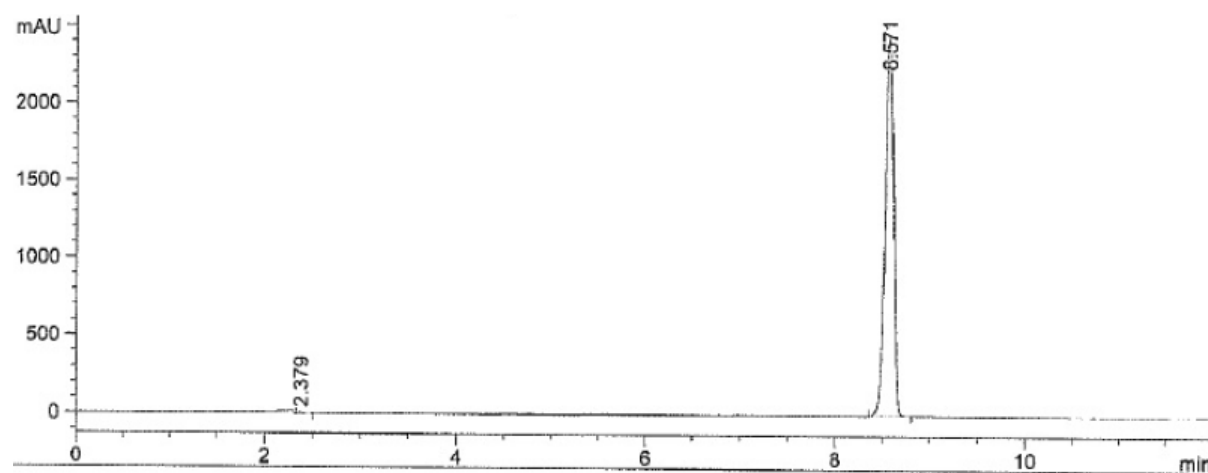

# COMPOUND 14

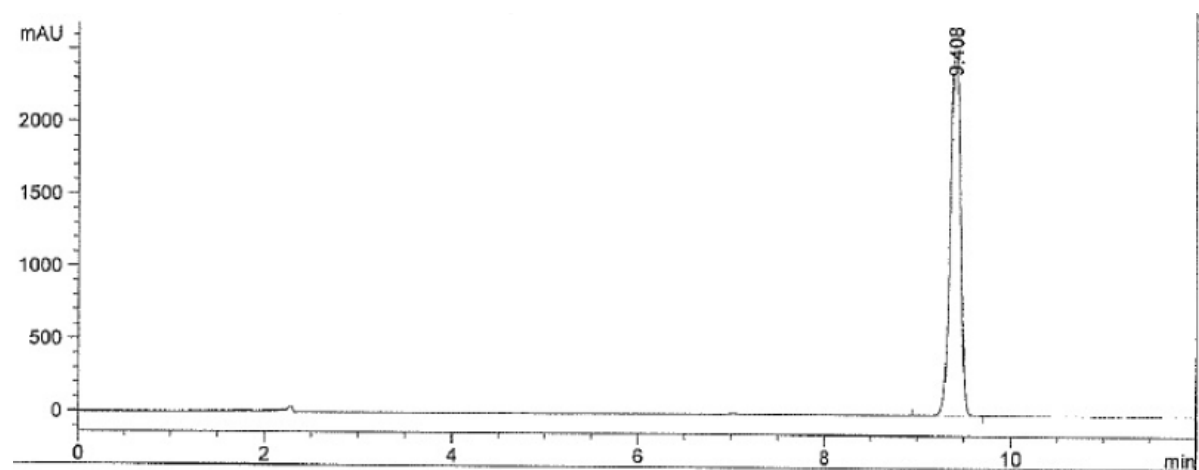

# COMPOUND 15

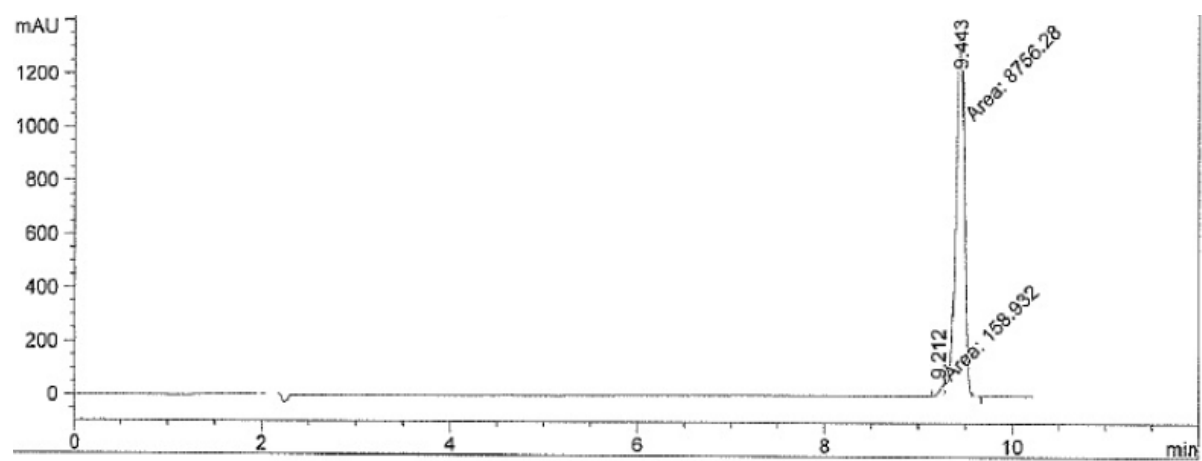

# COMPOUND 16

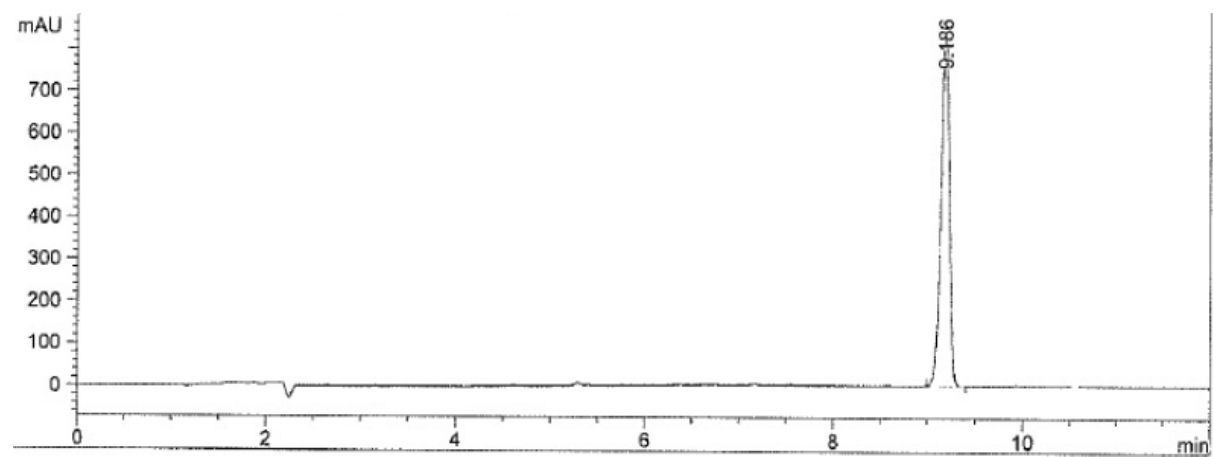

### COMPOUND 17

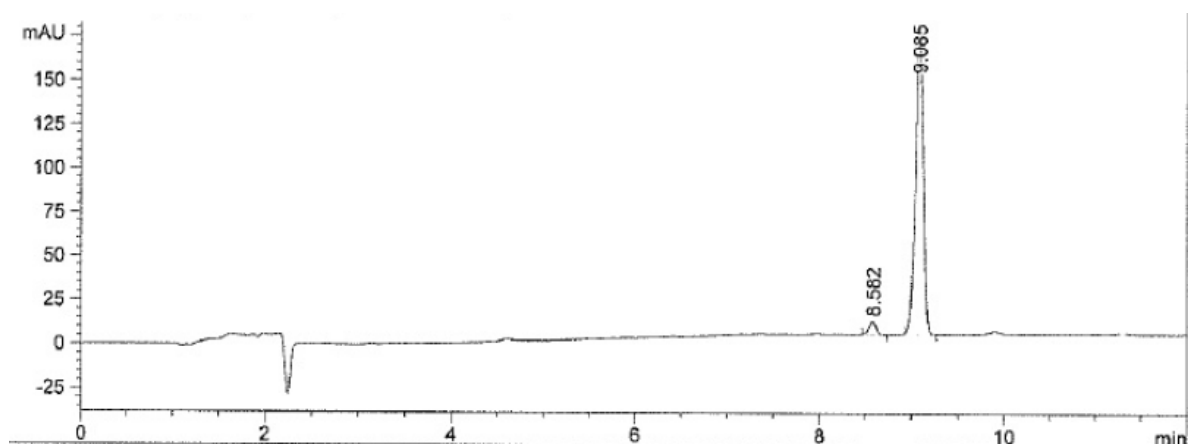

### COMPOUND 18

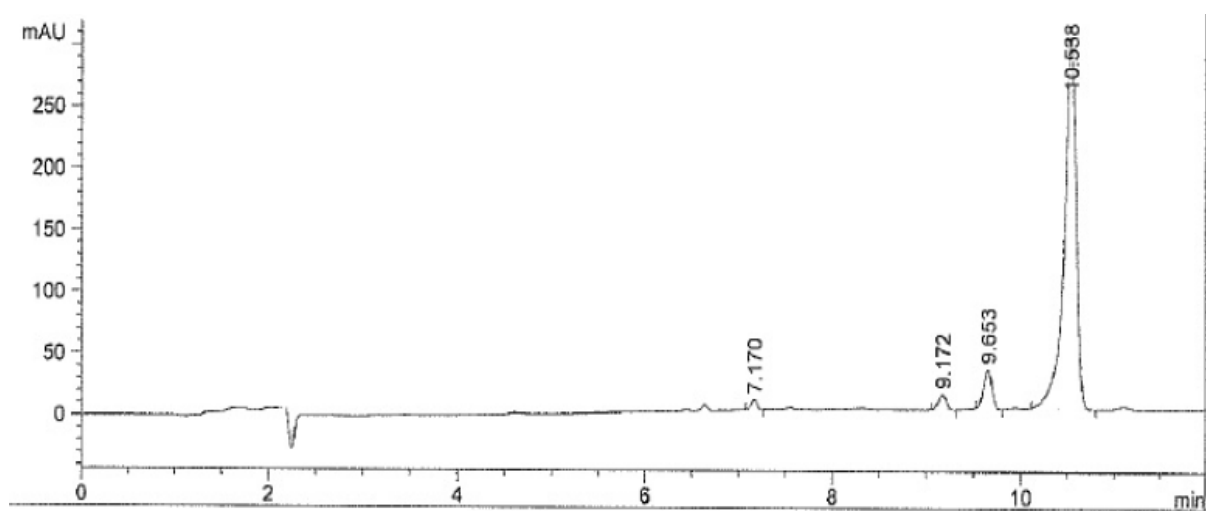

### COMPOUND 19

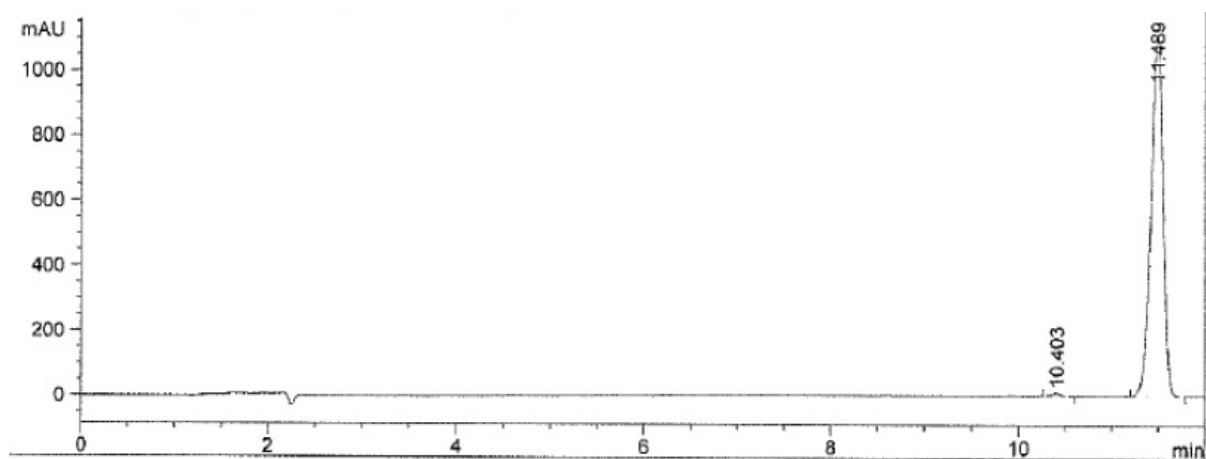

# COMPOUND 20

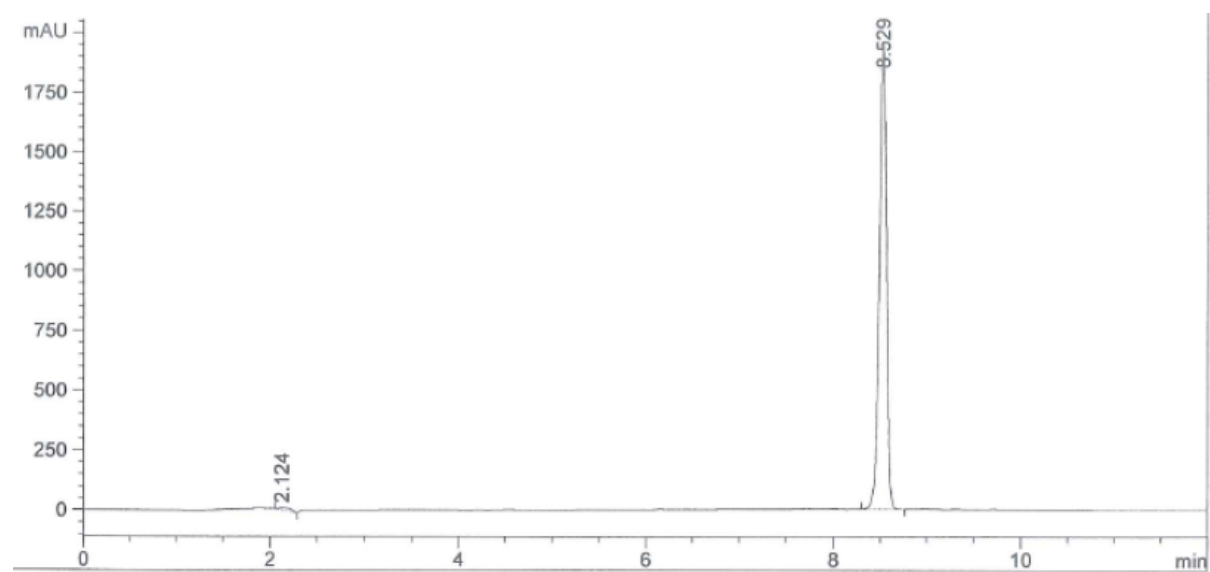

# COMPOUND 21

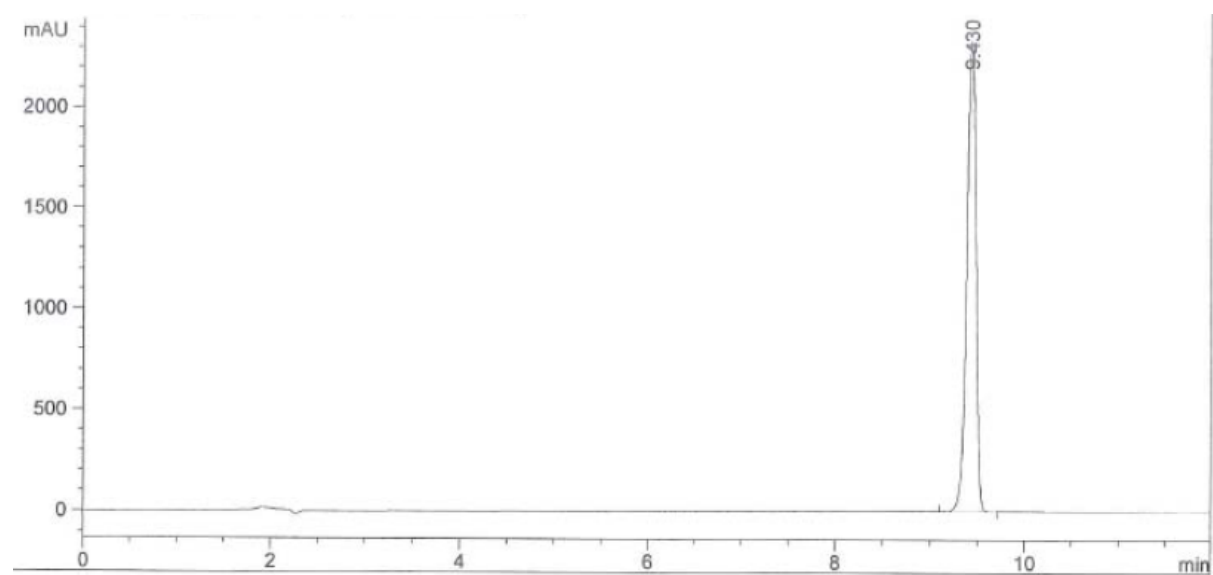

Supplement: s1 [file s1]
